# Supplementary material for: Anticancer activity of 4-aminoquinoline-triazine based molecular hybrids
Source: Royal Society of Chemistry journal article supplement (doi:10.1039/c3ra45333b), 2013-11-25

## (Supplementary Information)

### Anticancer activity of 4-aminoquinoline-triazine based molecular hybrids

Sunny Manohar,<sup>a</sup> Antonella Pepe,<sup>b</sup> Christian E. Vélez Gerena,<sup>c</sup> Beatriz Zayas,<sup>c</sup> Sanjay V. Malhotra<sup>b\*</sup> and Diwan S. Rawat<sup>a\*</sup>

---

| S. No. | Topic                             | Page |
|--------|-----------------------------------|------|
| 1.     | One dose Mean Graph (Compound 11) | 2    |
| 2.     | One dose Mean Graph (Compound 14) | 3    |
| 3.     | FIVE dose results (Compound 11)   | 4-6  |
| 4.     | FIVE dose results (Compound 14)   | 7-10 |

---

## One dose Mean Graph (Compound 11)

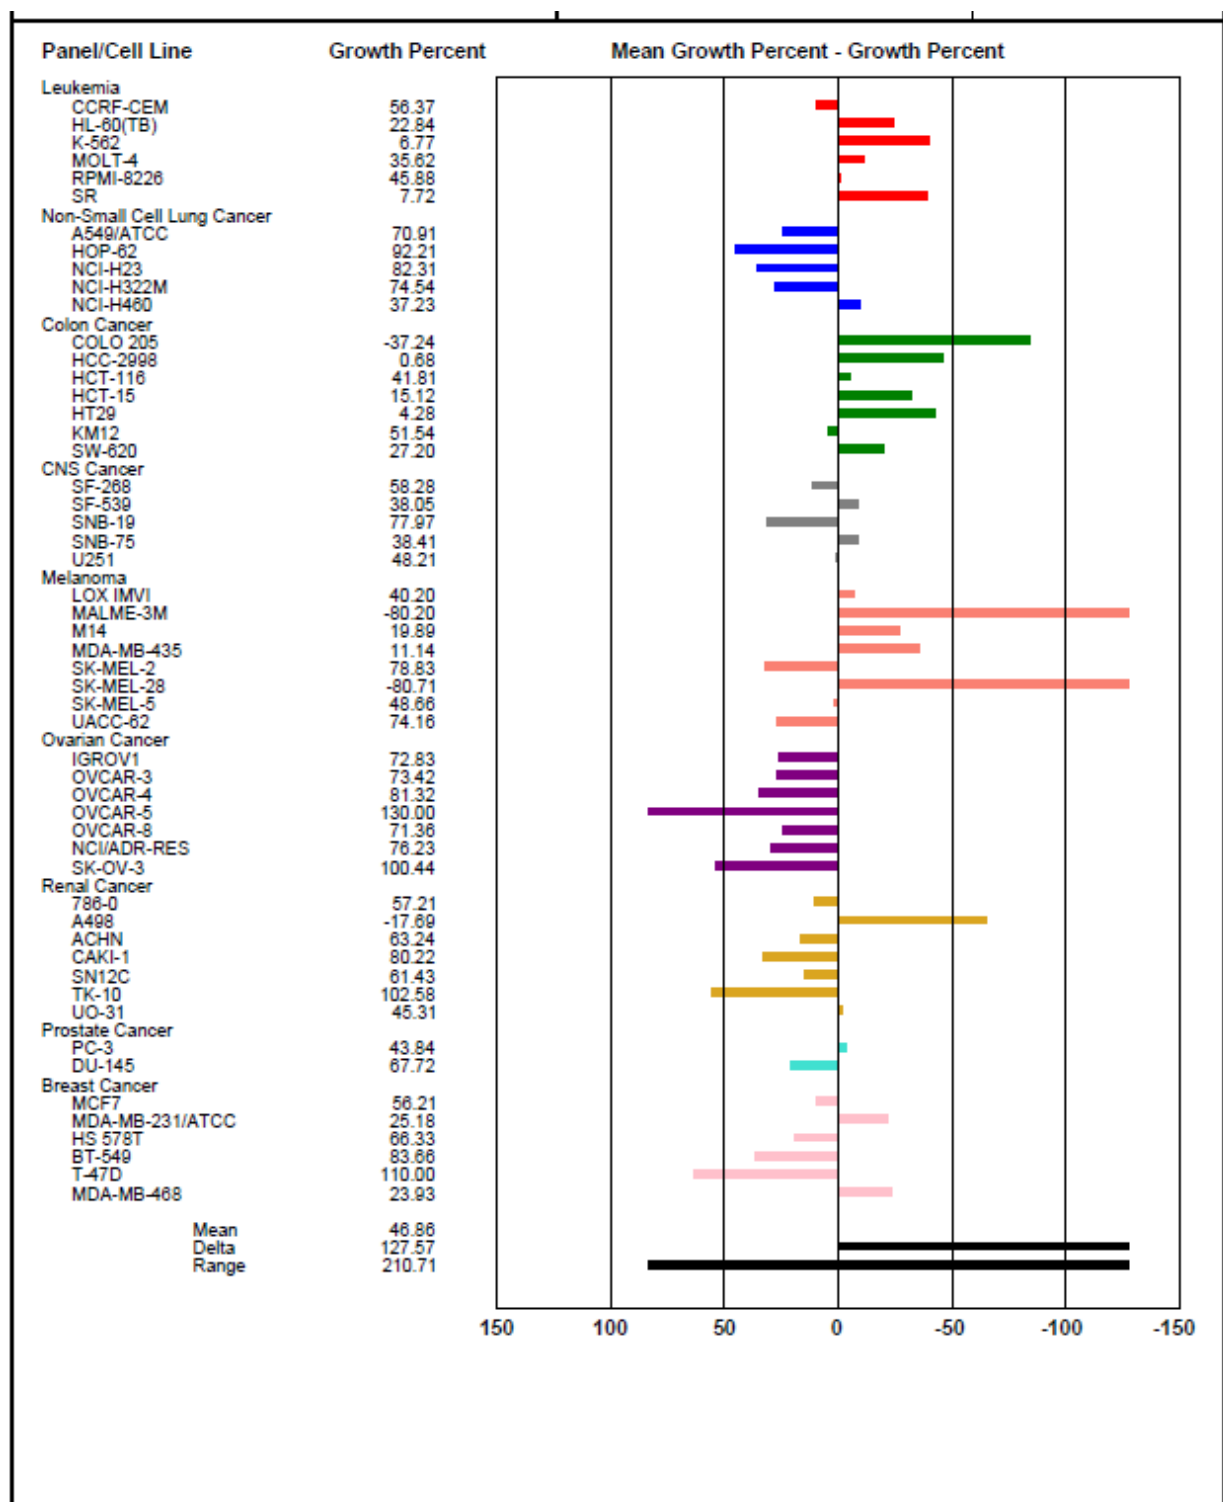

## One dose Mean Graph (Compound 14)

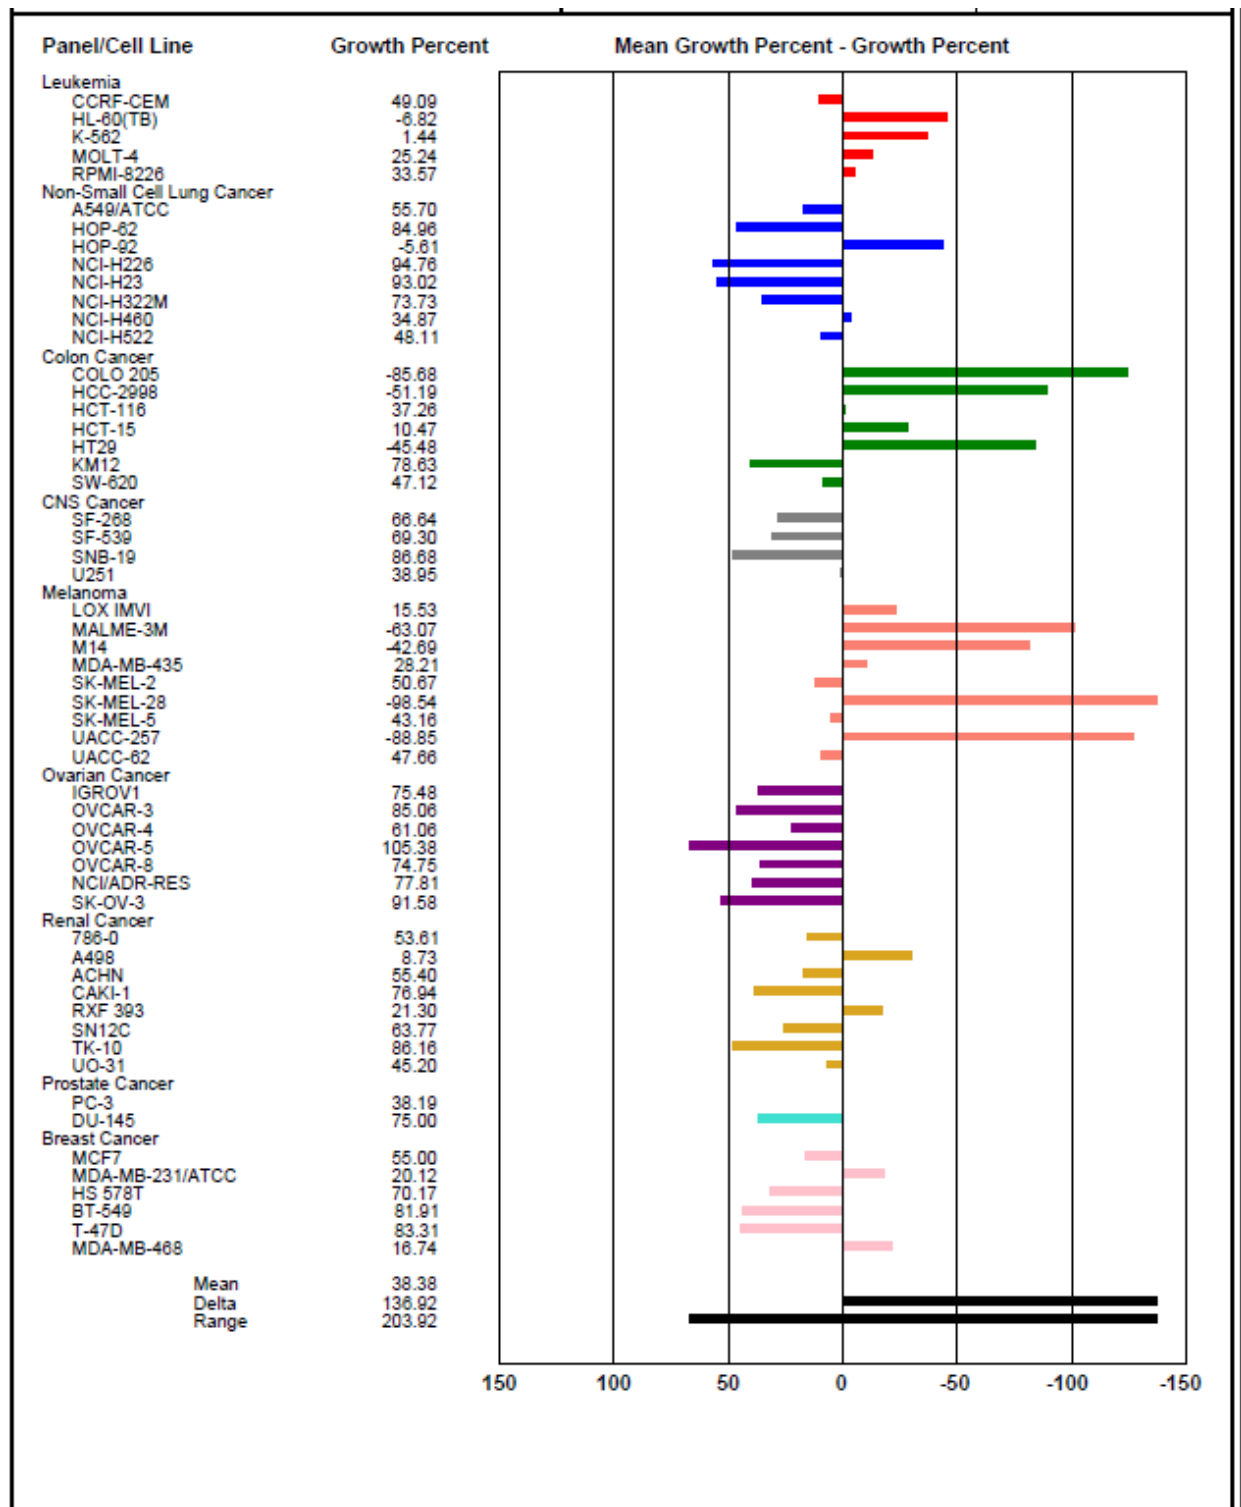

## FIVE dose results (Compound 11)

### Dose response curves

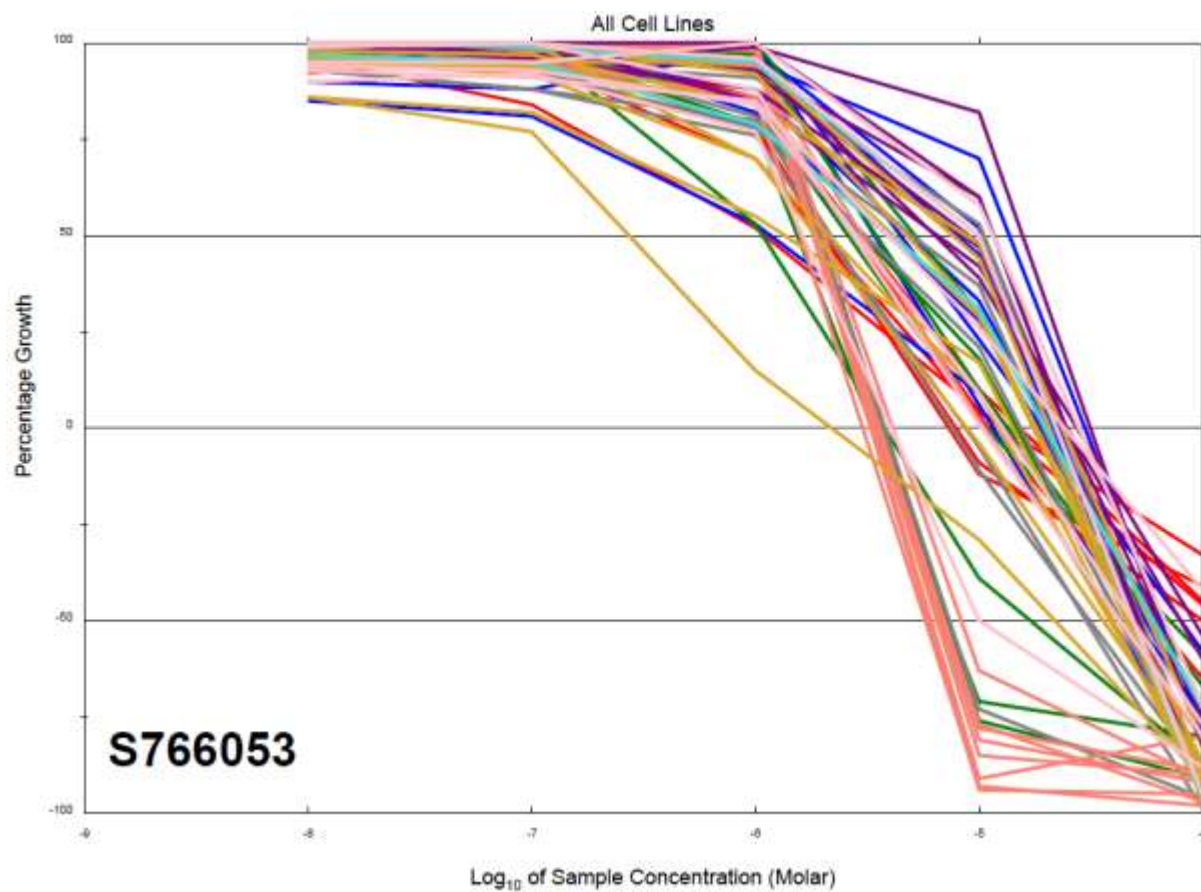



## FIVE dose results (Compound 11)

### Mean graph

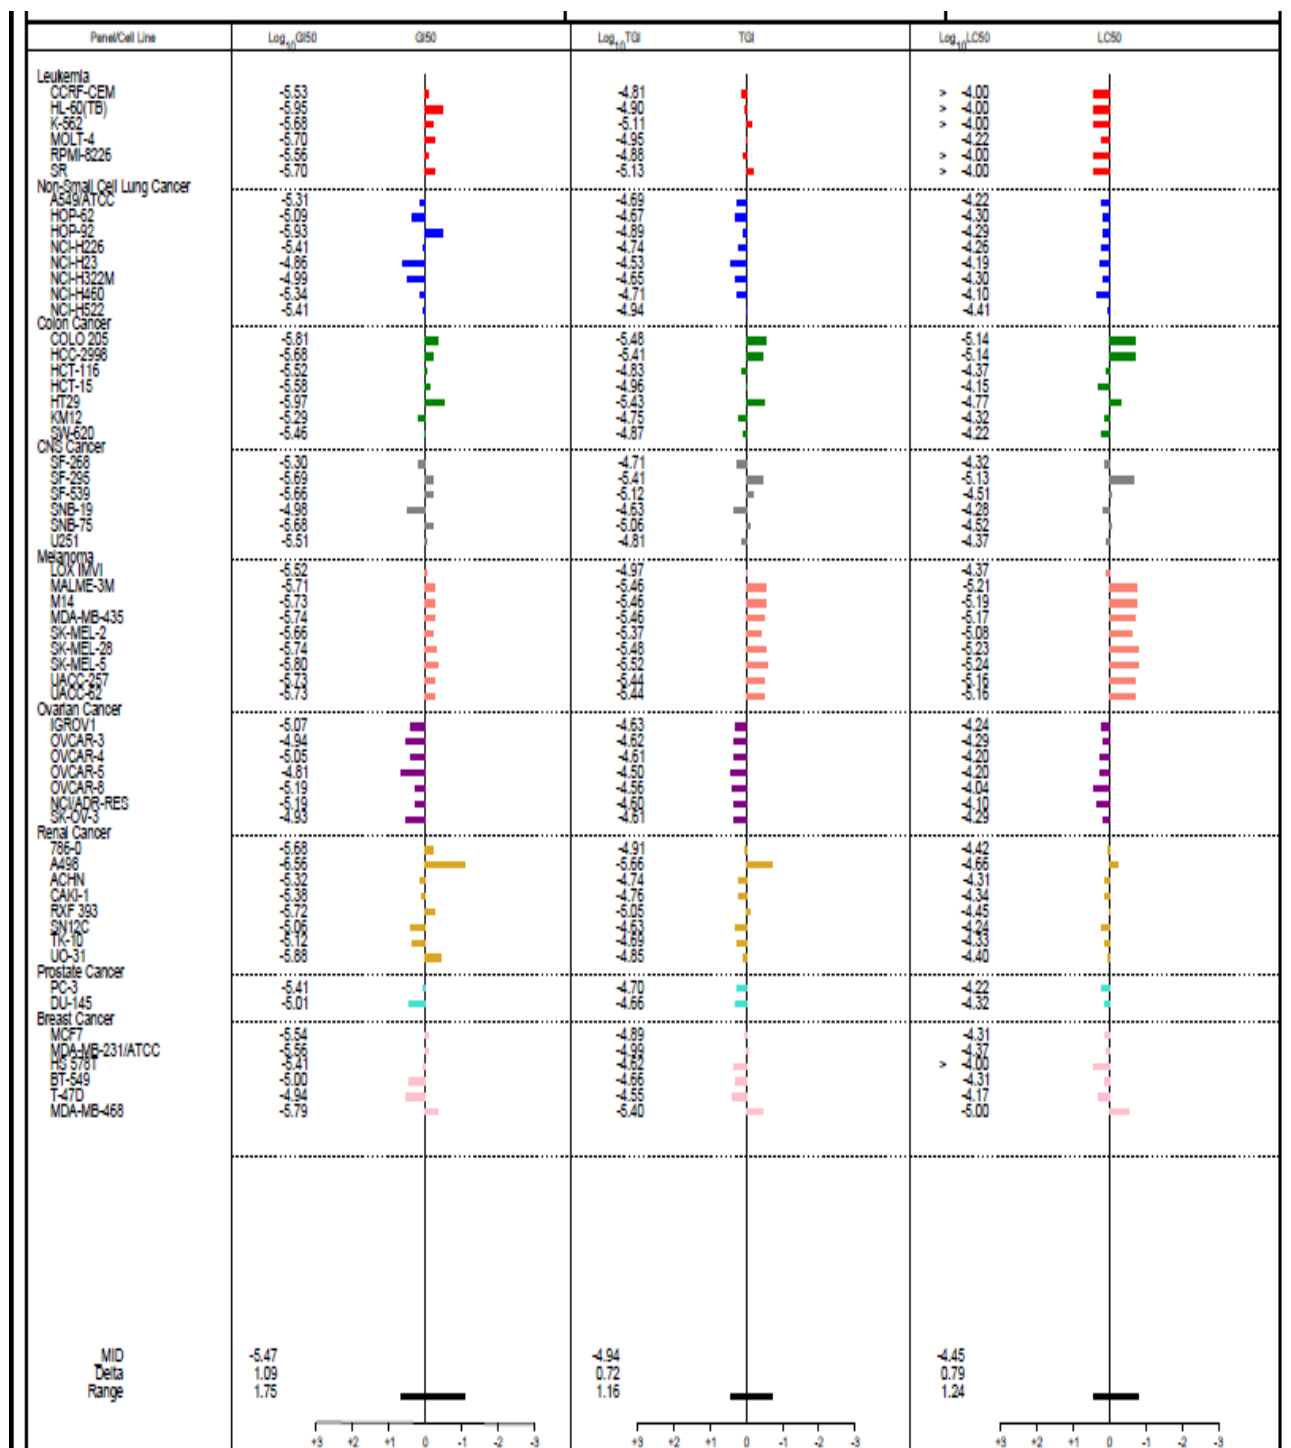

## FIVE dose results (Compound 14)

### Dose response curves

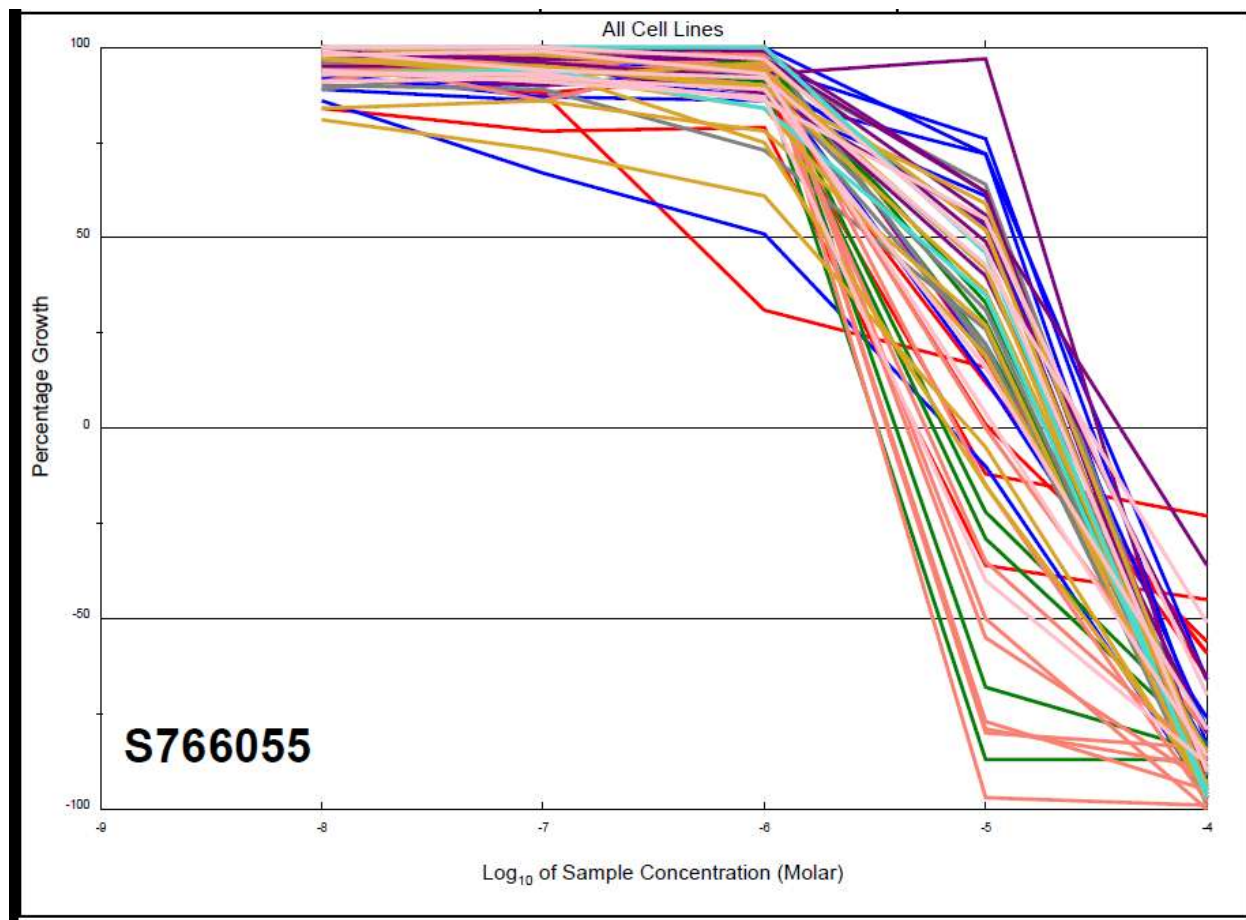



## FIVE dose curves for individual cancer panel (Compound 14)

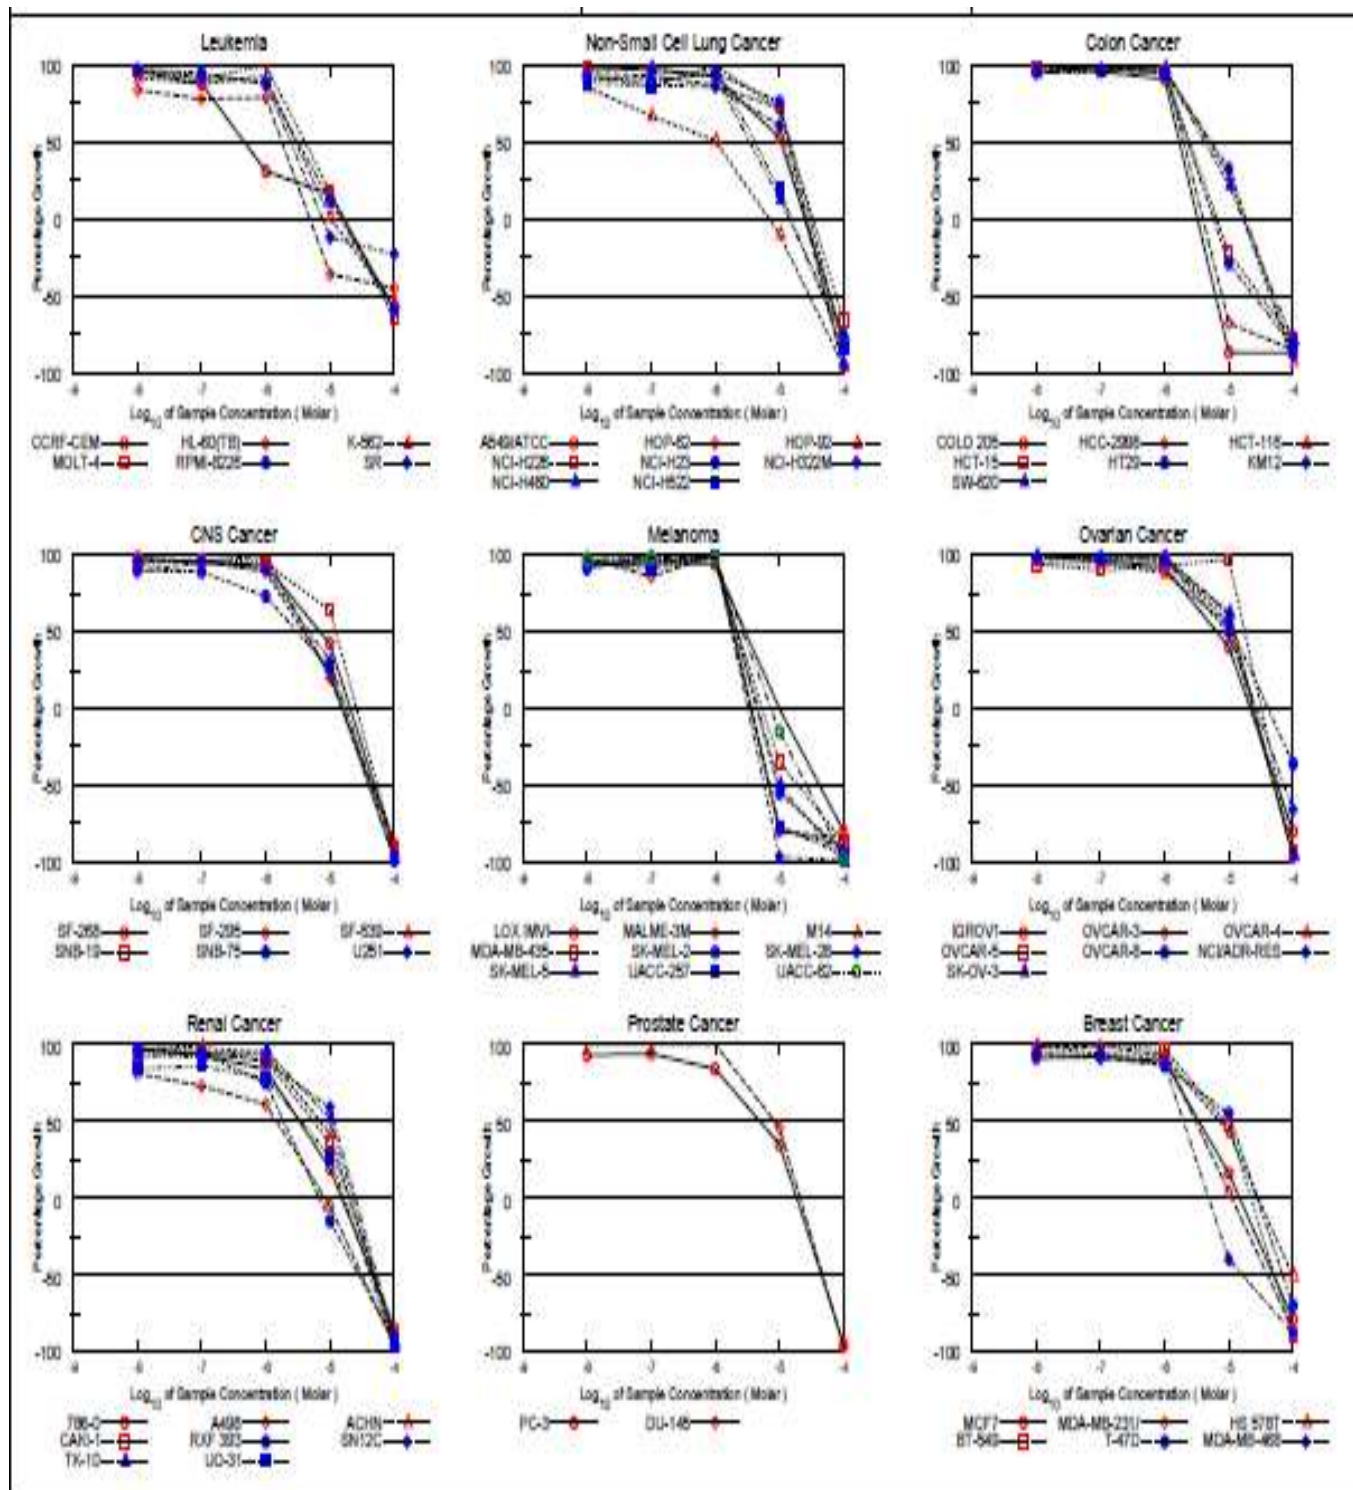





## FIVE dose results (Compound 14)

### Mean graph

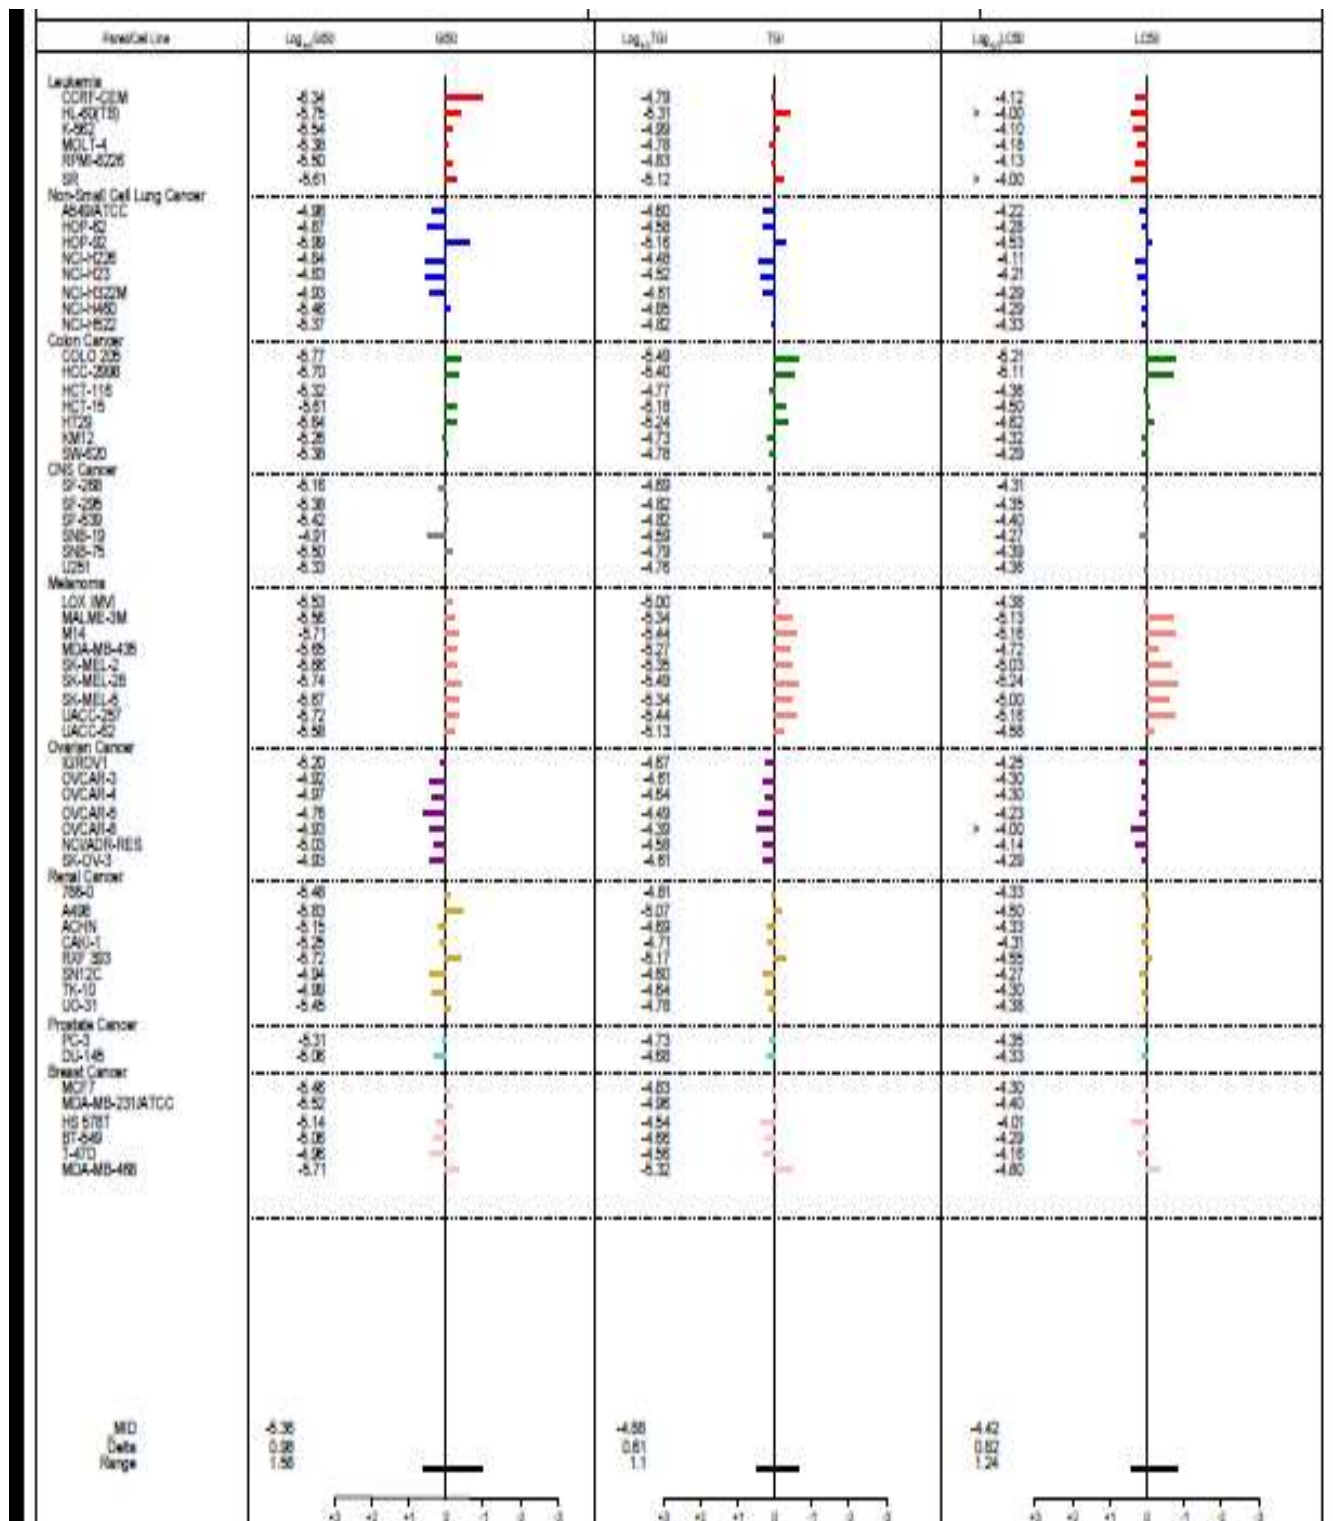

Supplement: c3ra45333b.pdf [file c3ra45333b.pdf]
